# Supplementary material for: Associations of Body Mass Index with Ventilation Management and Clinical Outcomes in Invasively Ventilated Patients with ARDS Related to COVID-19—Insights from the PRoVENT-COVID Study
Source: PubMed Central journal article supplement (PMC8000207; doi:10.3390/jcm10061176), 2021-03-11
Supplement: jcm-10-01176-s001.pdf [file jcm-10-01176-s001.pdf]

# SUPPLEMENTARY MATERIAL

**Figure S1 - Cumulative Distribution Plots of Ventilatory Variables at the Second Day of Ventilation**

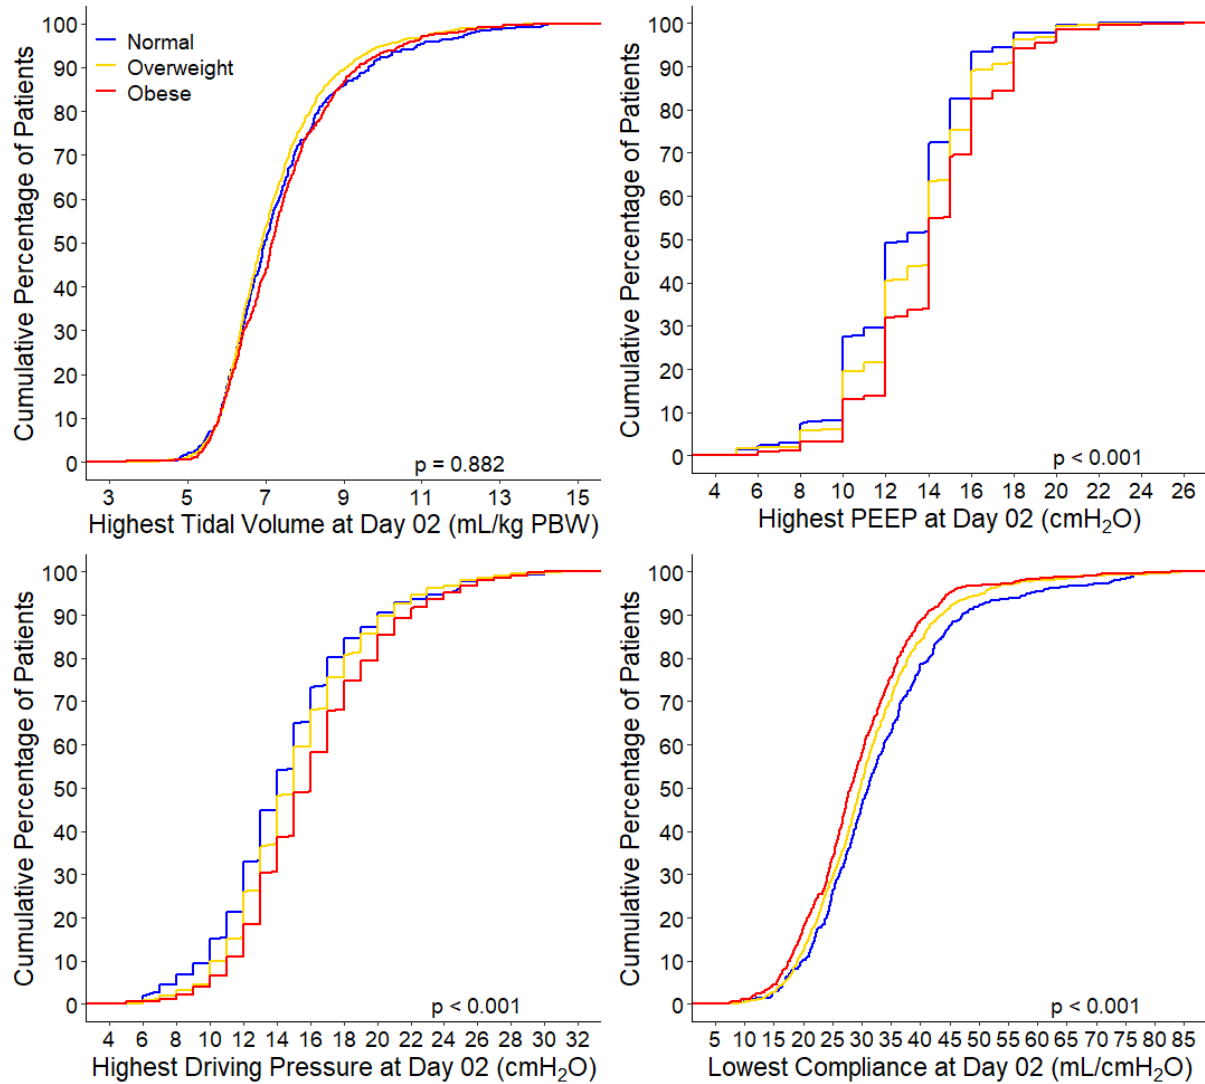

Curves that rise more slowly represents higher values in the studied variables. Highest or lowest values were extracted from three measurements available in the first day of ventilation. *P* values calculated from Kruskal–Wallis tests.

**Figure S2 - Cumulative Distribution Plots of Ventilatory Variables at the Third Day of Ventilation**

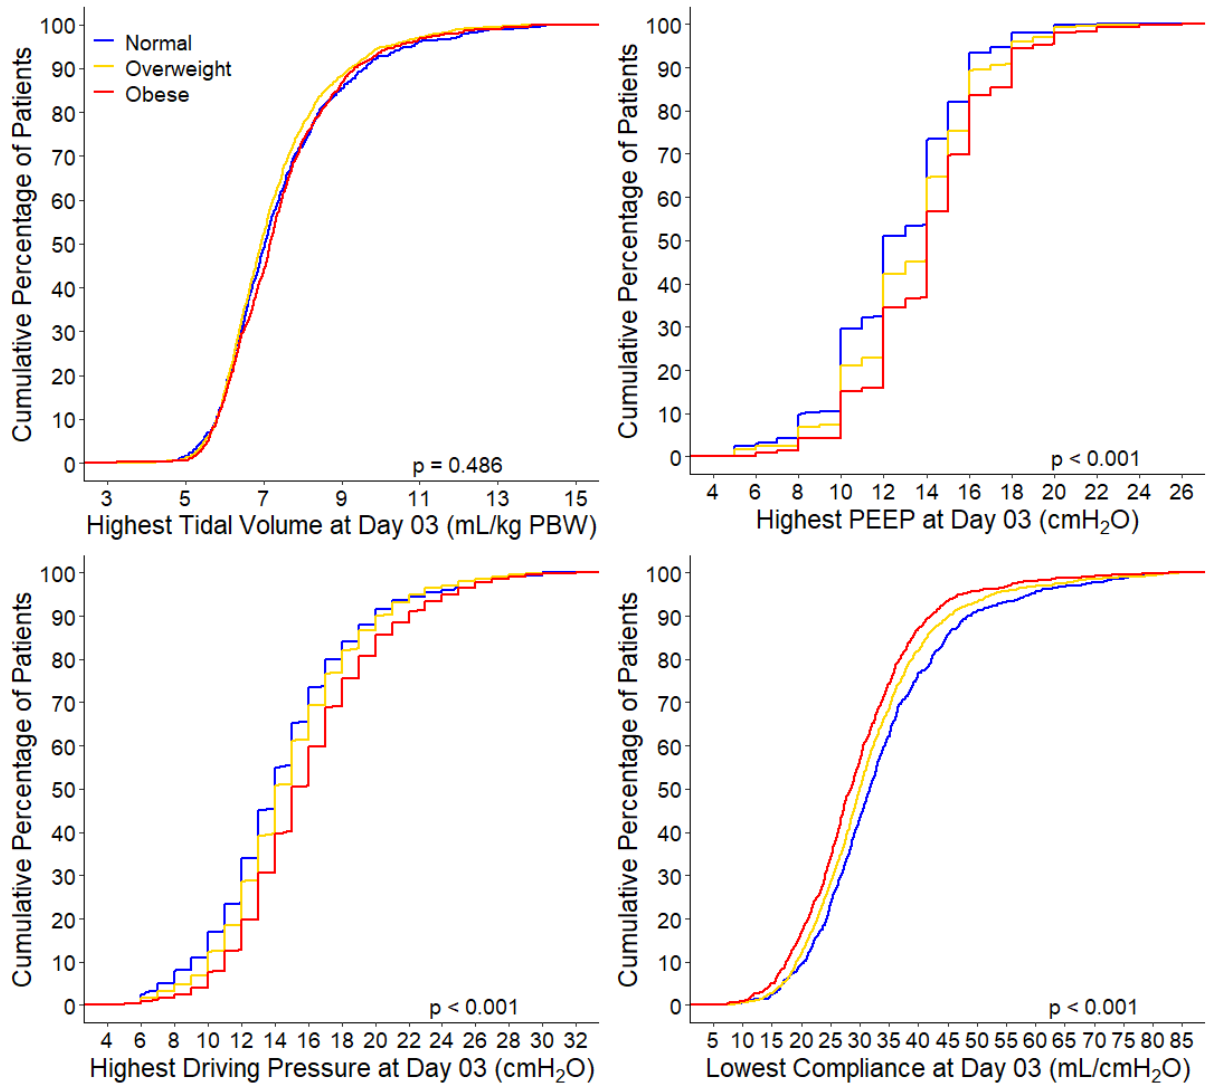

Curves that rise more slowly represents higher values in the studied variables. Highest or lowest values were extracted from three measurements available in the second day of ventilation. *P* values calculated from Kruskal–Wallis tests.

**Figure S3 - Cumulative Distribution Plots of Ventilatory Variables at the Fourth Day of Ventilation**

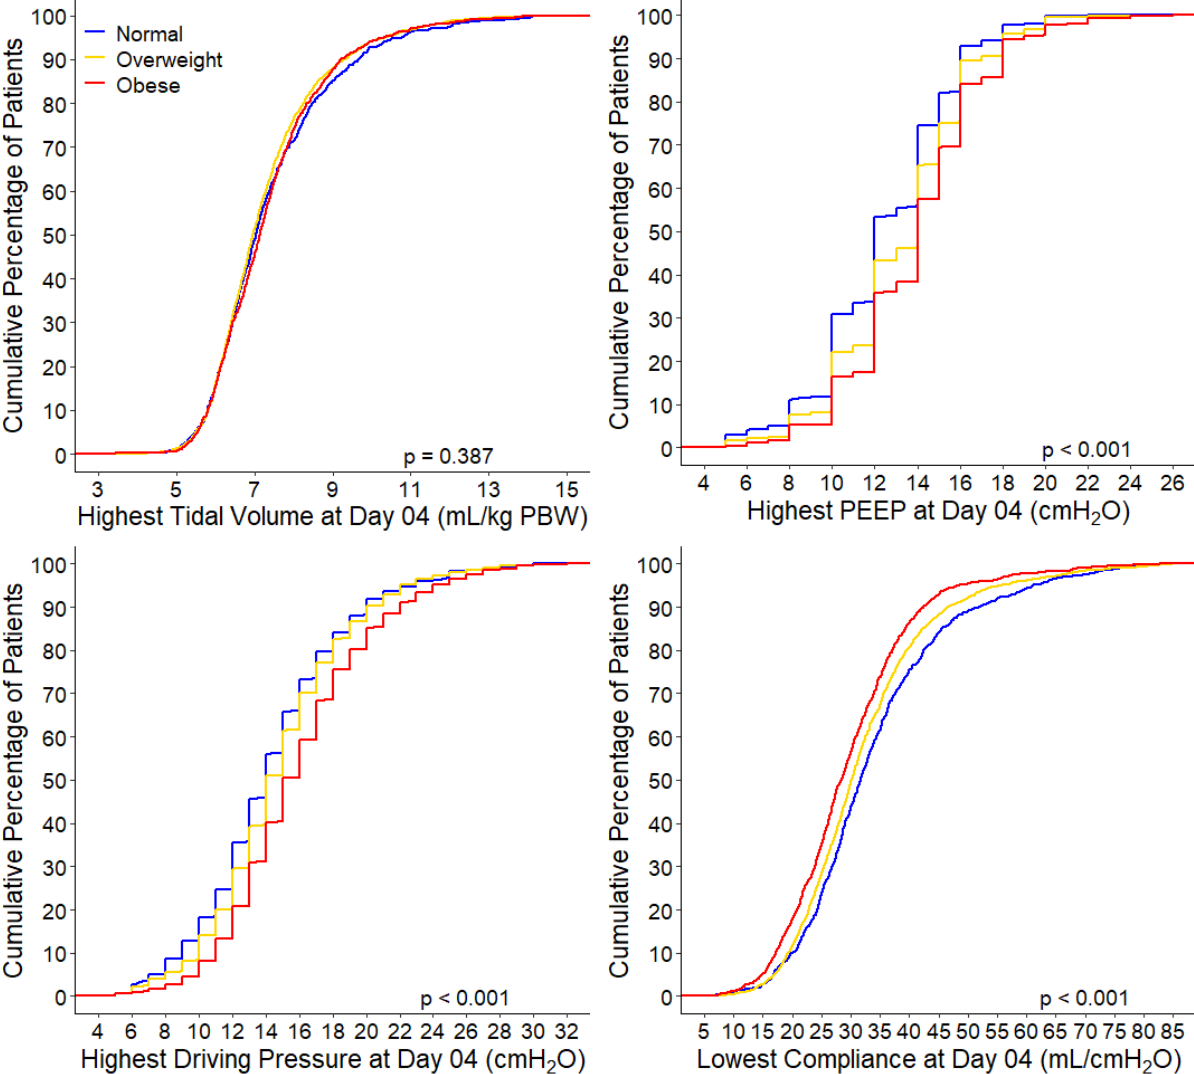

Curves that rise more slowly represents higher values in the studied variables. Highest or lowest values were extracted from three measurements available in the third day of ventilation. *P* values calculated from Kruskal–Wallis tests.

**Figure S4 - Ventilatory Variables and Oxygenation in the First Four Days of Ventilation**

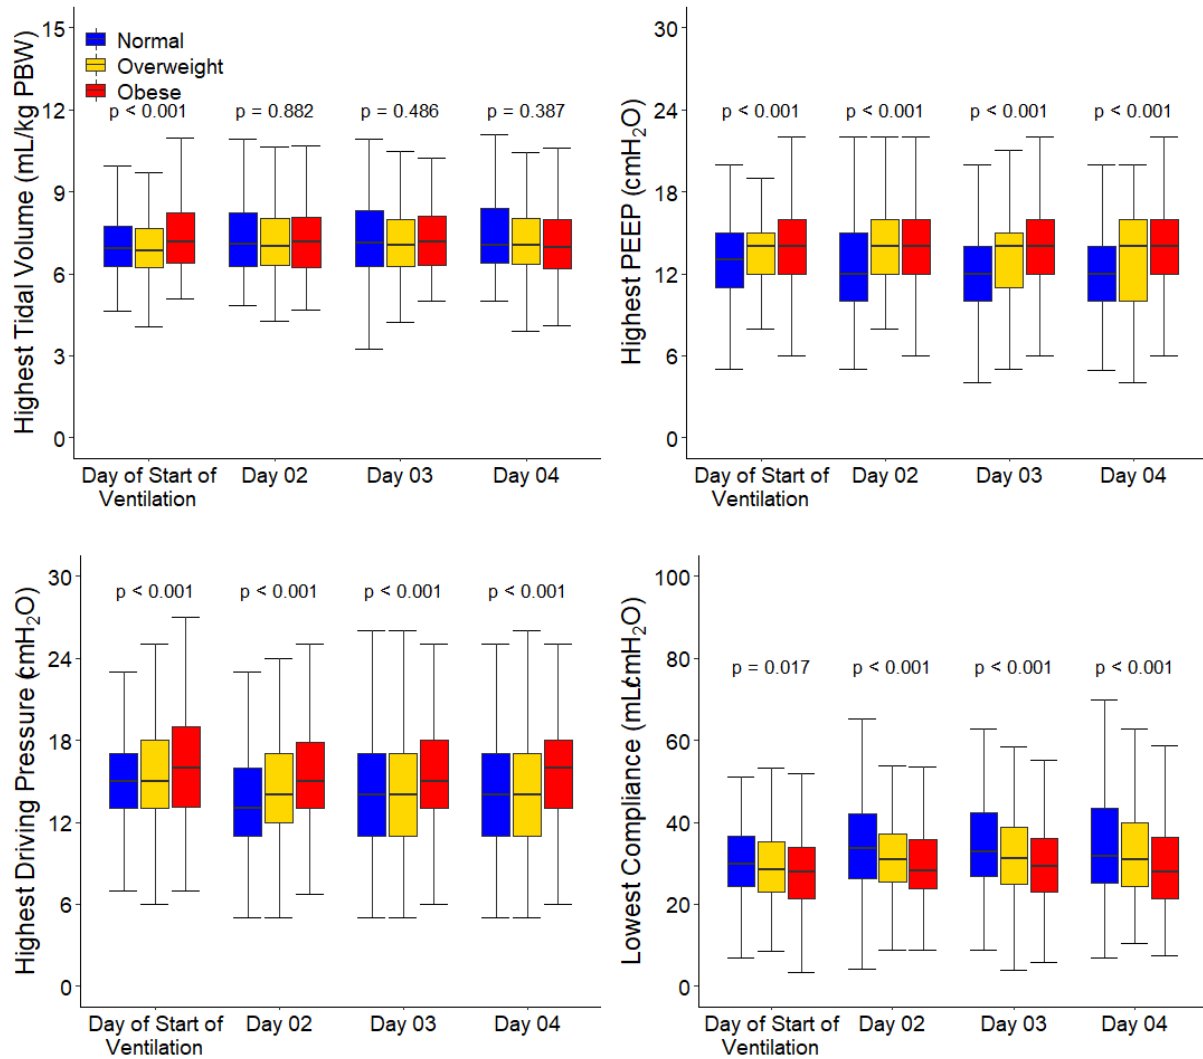

Boxes represent median and interquartile range. Whiskers extend 1.5 times the interquartile range beyond the first and third quartiles per the conventional Tukey method. Highest or lowest values were extracted from three or four measurements available in each day of ventilation. *P* values calculated from Kruskal–Wallis tests.

**Figure S5 - Kaplan-Meier Curve for 90-Day Mortality in the Overall Population and According to ARDS Severity**

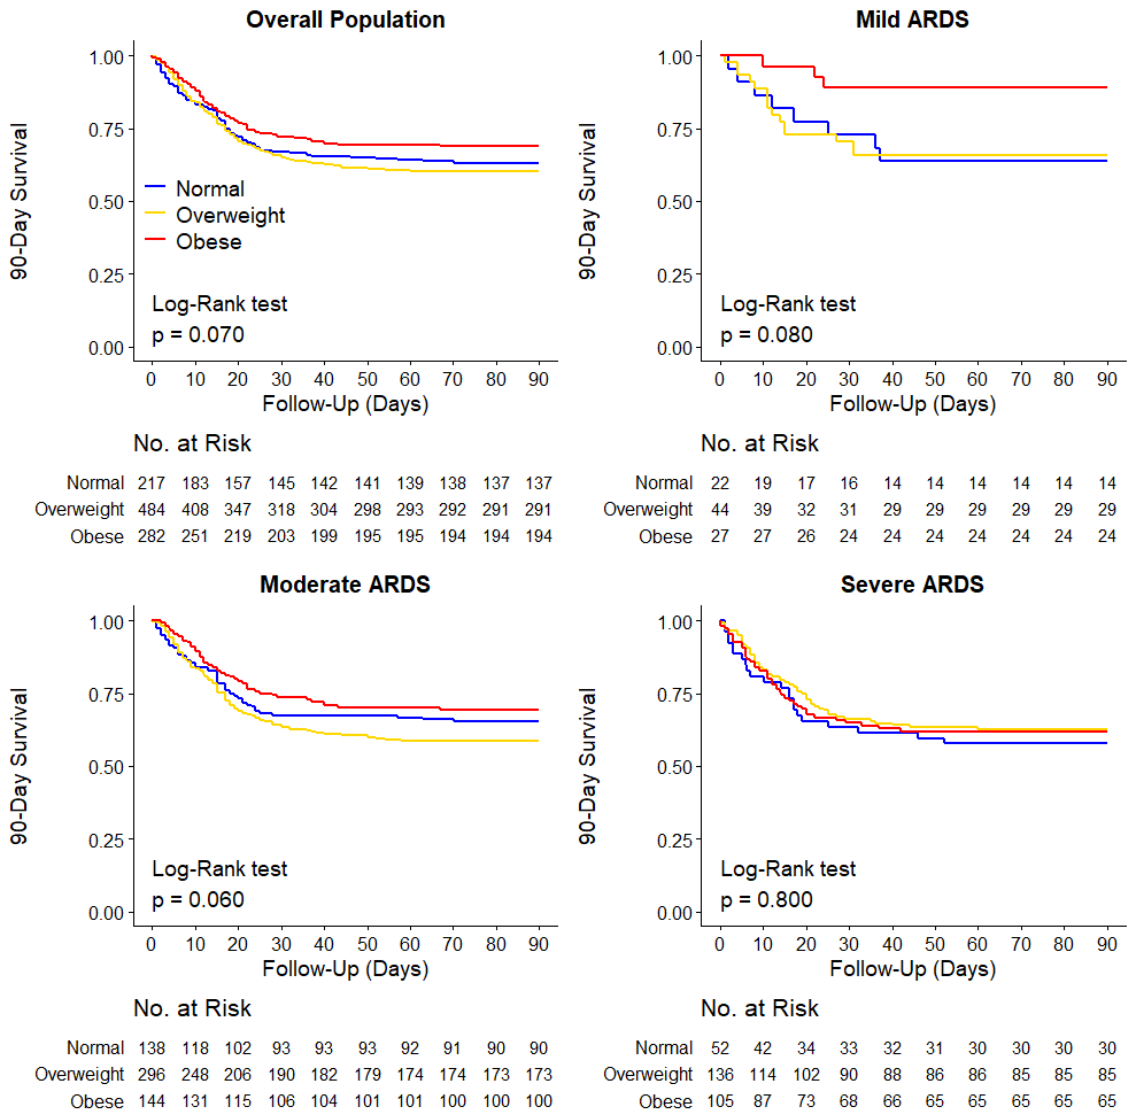

P values calculated from Log-Rank test. Unadjusted and adjusted (shared-frailty) Cox proportional hazard models are shown in eTables 4 and 5.

**Figure S6 - Cumulative Distribution Plots of Ventilatory Variables and Oxygenation at the First Day of Ventilation**

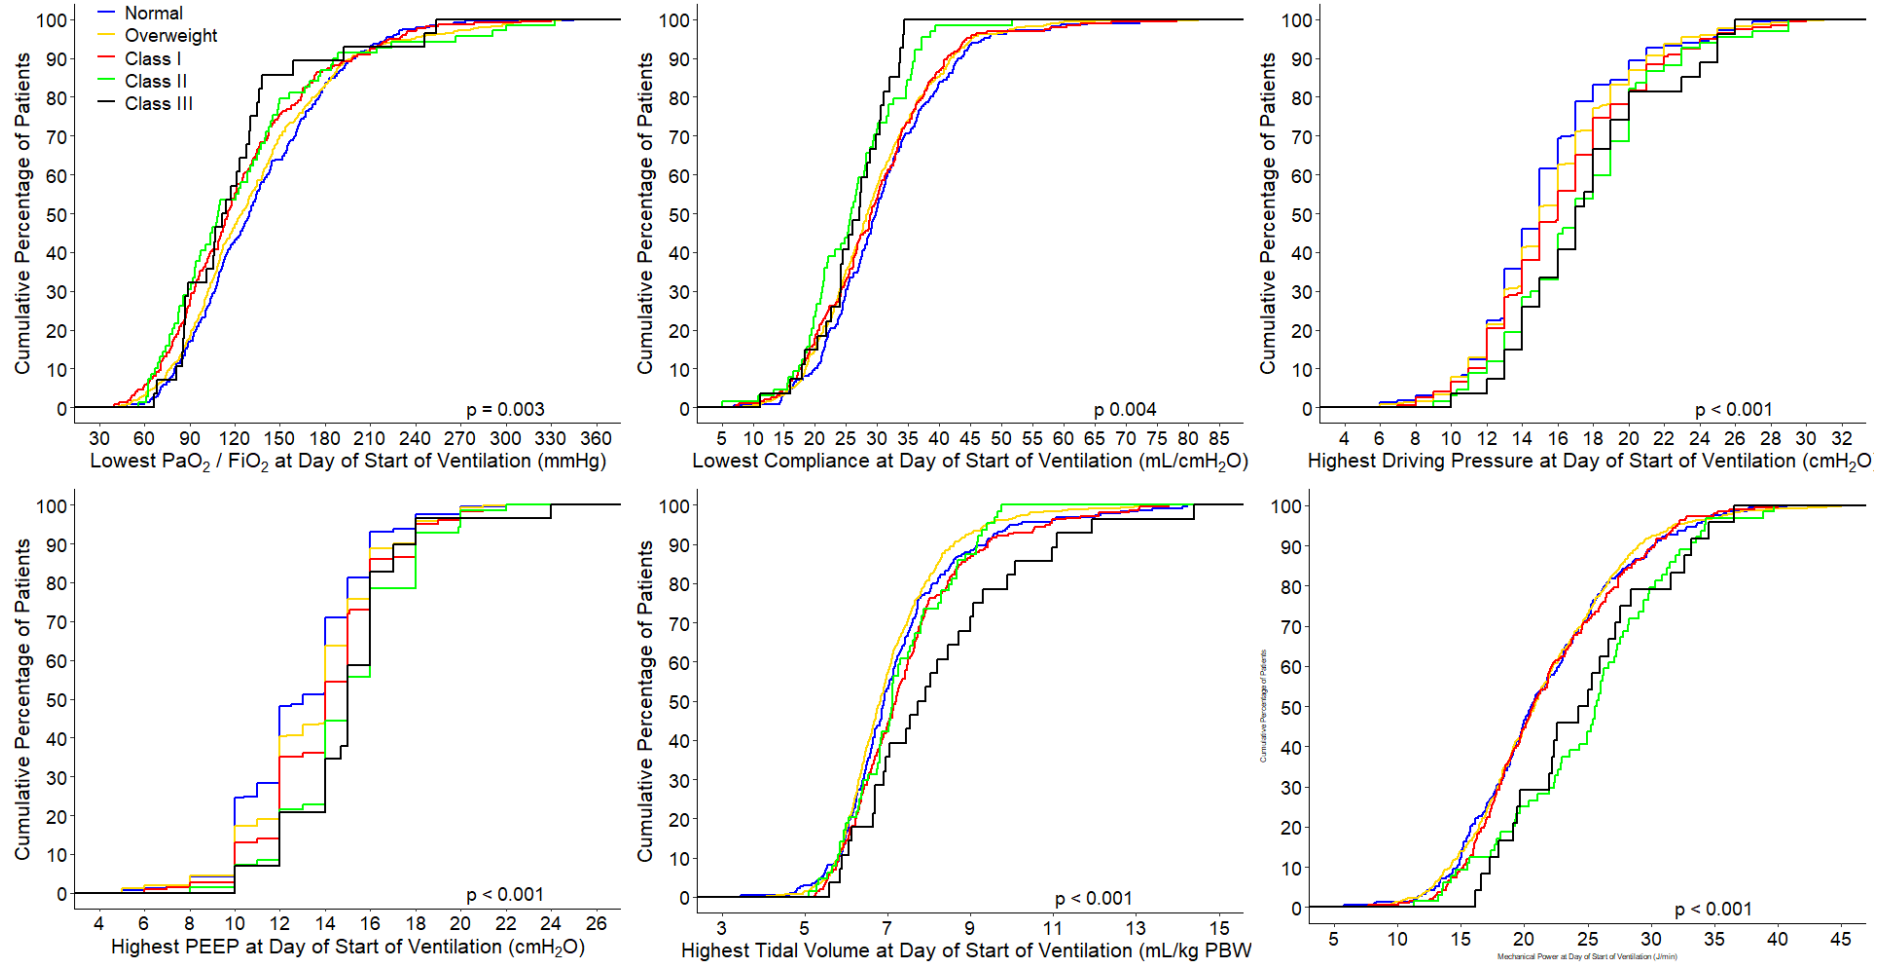

Curves that rise more slowly represents higher values in the studied variables. *P* values calculated from Kruskal-Wallis tests. Highest or lowest values were extracted from three measurements available in the third day of ventilation.

**Figure S7 - Kaplan-Meier Curve for 28-Day Mortality in the Overall Population and According to ARDS Severity**

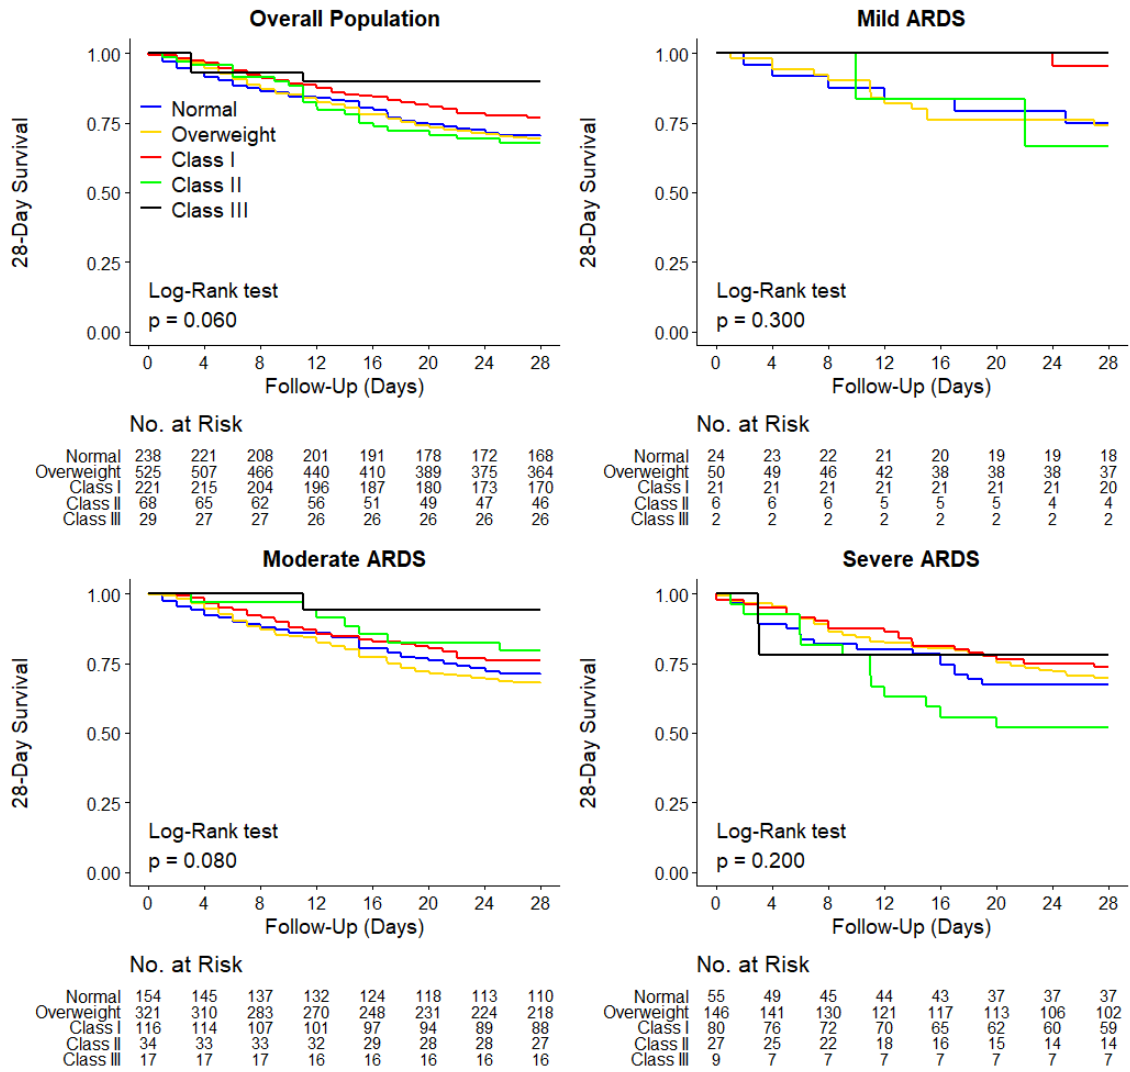

P values calculated from Log-Rank test. Unadjusted and adjusted (shared-frailty) Cox proportional hazard models are shown in eTable 8.

**Table S1. - Univariable Assessment of Factors Associated with 28-Day Mortality.**

|                                                               | <b>Hazard Ratio<br/>(95% CI)</b> | <b>p value</b> |
|---------------------------------------------------------------|----------------------------------|----------------|
| <b>Body mass index category</b>                               |                                  |                |
| Normal                                                        | 1 (Reference)                    |                |
| Overweight                                                    | 1.02 (0.77 to 1.35)              | 0.890          |
| Obese                                                         | 0.78 (0.57 to 1.09)              | 0.140          |
| <b>Demographic characteristics</b>                            |                                  |                |
| Age                                                           | 2.02 (1.74 to 2.35)              | < 0.001        |
| Male gender                                                   | 1.19 (0.91 to 1.55)              | 0.210          |
| <b>Severity of ARDS</b>                                       |                                  |                |
| Mild                                                          | 1 (Reference)                    |                |
| Moderate                                                      | 1.38 (0.88 to 2.16)              | 0.155          |
| Severe                                                        | 1.46 (0.91 to 2.35)              | 0.113          |
| <b>Co-existing disorders</b>                                  |                                  |                |
| Hypertension                                                  | 1.58 (1.26 to 1.98)              | < 0.001        |
| Heart failure                                                 | 1.73 (1.09 to 2.74)              | 0.019          |
| Diabetes                                                      | 1.65 (1.29 to 2.11)              | < 0.001        |
| Chronic kidney disease                                        | 1.27 (0.76 to 2.10)              | 0.360          |
| Chronic obstructive pulmonary disease                         | 1.61 (1.12 to 2.31)              | 0.010          |
| Active hematological neoplasia                                | 1.52 (0.67 to 3.44)              | 0.320          |
| Active solid neoplasia                                        | 1.72 (0.93 to 3.19)              | 0.082          |
| <b>Previous medication</b>                                    |                                  |                |
| Angiotensin converting enzyme inhibitor                       | 1.39 (1.05 to 1.83)              | 0.021          |
| Angiotensin II receptor blocker                               | 1.35 (0.98 to 1.87)              | 0.069          |
| <b>Vital signs at the day of start of ventilation</b>         |                                  |                |
| Heart rate                                                    | 1.17 (1.04 to 1.30)              | 0.008          |
| Mean arterial pressure                                        | 0.80 (0.71 to 0.91)              | < 0.001        |
| <b>Laboratory tests at the day of start of ventilation</b>    |                                  |                |
| Creatinine                                                    | 1.06 (0.99 to 1.14)              | 0.087          |
| pH                                                            | 0.66 (0.59 to 0.73)              | < 0.001        |
| <b>Ventilation support at the day of start of ventilation</b> |                                  |                |
| Tidal volume per PBW                                          | 1.05 (0.96 to 1.15)              | 0.310          |
| PEEP                                                          | 1.19 (1.06 to 1.35)              | 0.004          |
| Compliance                                                    | 1.00 (0.88 to 1.14)              | 0.970          |
| <b>Organ support at the day of start of ventilation</b>       |                                  |                |
| Fluid balance                                                 | 1.18 (1.06 to 1.32)              | 0.003          |
| Use of vasopressor                                            | 1.35 (1.01 to 1.80)              | 0.044          |
| <b>Rescue therapy at the day of start of ventilation</b>      |                                  |                |
| Prone positioning                                             | 0.71 (0.55 to 0.93)              | 0.014          |
| Use of NMBA                                                   | 0.95 (0.73 to 1.23)              | 0.680          |

Continuous variables were included after standardization and the hazard ratio represents the increase in one standard deviation of the variable.

Variables with a  $p < 0.200$  were selected for inclusion in the multivariable model.



**Table S2 - Multivariable Assessment of Factors Associated with 28-Day Mortality**

|                                                               | Hazard Ratio<br>(95% CI) | <i>p</i> value |
|---------------------------------------------------------------|--------------------------|----------------|
| <b>Body mass index category</b>                               |                          |                |
| Normal                                                        | 1 (Reference)            |                |
| Overweight                                                    | 1.10 (0.83 to 1.47)      | 0.500          |
| Obese                                                         | 0.89 (0.63 to 1.25)      | 0.510          |
| <b>Demographic characteristics</b>                            |                          |                |
| Age                                                           | 1.82 (1.55 to 2.14)      | < 0.001        |
| <b>Co-existing disorders</b>                                  |                          |                |
| Hypertension                                                  | 1.28 (1.00 to 1.64)      | 0.048          |
| Heart failure                                                 | 1.25 (0.78 to 2.02)      | 0.350          |
| Diabetes                                                      | 1.36 (1.04 to 1.76)      | 0.023          |
| Chronic obstructive pulmonary disease                         | 1.53 (1.06 to 2.22)      | 0.025          |
| <b>Previous medication</b>                                    |                          |                |
| Angiotensin converting enzyme inhibitor                       | 0.98 (0.72 to 1.32)      | 0.880          |
| <b>Vital signs at the day of start of ventilation</b>         |                          |                |
| Heart rate                                                    | 1.15 (1.02 to 1.30)      | 0.023          |
| Mean arterial pressure                                        | 0.88 (0.78 to 0.99)      | 0.034          |
| <b>Laboratory tests at the day of start of ventilation</b>    |                          |                |
| pH                                                            | 0.71 (0.62 to 0.81)      | < 0.001        |
| <b>Ventilation support at the day of start of ventilation</b> |                          |                |
| PEEP                                                          | 1.25 (1.10 to 1.42)      | < 0.001        |
| <b>Organ support at the day of start of ventilation</b>       |                          |                |
| Fluid balance                                                 | 1.08 (0.96 to 1.21)      | 0.210          |
| Use of vasopressor                                            | 1.09 (0.80 to 1.48)      | 0.580          |
| <b>Rescue therapy at the day of start of ventilation</b>      |                          |                |
| Prone positioning                                             | 0.59 (0.44 to 0.77)      | < 0.001        |

Continuous variables were included after standardization and the hazard ratio represents the increase in one standard deviation of the variable.

**Table S3 - Adjusted Effect of Body Mass Index Categories in 28-Day, ICU, Hospital and 90-Day Mortality\***

|                           | Mild ARDS                   |                | Moderate ARDS               |                | Severe ARDS                 |                |
|---------------------------|-----------------------------|----------------|-----------------------------|----------------|-----------------------------|----------------|
|                           | Effect Estimate<br>(95% CI) | <i>p</i> value | Effect Estimate<br>(95% CI) | <i>p</i> value | Effect Estimate<br>(95% CI) | <i>p</i> value |
| <b>28-Day mortality</b>   |                             |                |                             |                |                             |                |
| Body mass index category  |                             |                |                             |                |                             |                |
| Normal                    | 1 (Reference)               |                | 1 (Reference)               |                | 1 (Reference)               |                |
| Overweight                | HR, 0.60 (0.17 to 2.12)     | 0.430          | HR, 1.11 (0.77 to 1.59)     | 0.580          | HR, 0.94 (0.53 to 1.69)     | 0.850          |
| Obese                     | HR, 0.23 (0.04 to 1.38)     | 0.110          | HR, 0.72 (0.45 to 1.14)     | 0.170          | HR, 1.04 (0.55 to 1.98)     | 0.900          |
| <b>ICU mortality</b>      |                             |                |                             |                |                             |                |
| Body mass index category  |                             |                |                             |                |                             |                |
| Normal                    | 1 (Reference)               |                | 1 (Reference)               |                | 1 (Reference)               |                |
| Overweight                | OR, 0.65 (0.15 to 2.86)     | 0.573          | OR, 1.68 (1.05 to 2.70)     | 0.030          | OR, 0.85 (0.40 to 1.81)     | 0.671          |
| Obese                     | OR, 0.17 (0.02 to 1.42)     | 0.102          | OR, 1.04 (0.58 to 1.86)     | 0.895          | OR, 0.89 (0.39 to 2.03)     | 0.786          |
| <b>Hospital mortality</b> |                             |                |                             |                |                             |                |
| Body mass index category  |                             |                |                             |                |                             |                |
| Normal                    | 1 (Reference)               |                | 1 (Reference)               |                | 1 (Reference)               |                |
| Overweight                | OR, 0.48 (0.11 to 2.01)     | 0.315          | OR, 1.68 (1.04 to 2.73)     | 0.033          | OR, 0.92 (0.43 to 1.98)     | 0.835          |
| Obese                     | OR, 0.11 (0.01 to 0.89)     | 0.038          | OR, 1.05 (0.58 to 1.92)     | 0.858          | OR, 1.03 (0.45 to 2.38)     | 0.939          |
| <b>90-Day mortality</b>   |                             |                |                             |                |                             |                |
| Body mass index category  |                             |                |                             |                |                             |                |
| Normal                    | 1 (Reference)               |                | 1 (Reference)               |                | 1 (Reference)               |                |
| Overweight                | HR, 0.57 (0.19 to 1.73)     | 0.320          | HR, 1.19 (0.84 to 1.68)     | 0.330          | HR, 0.93 (0.54 to 1.59)     | 0.790          |
| Obese                     | HR, 0.22 (0.04 to 1.19)     | 0.079          | HR, 0.87 (0.56 to 1.35)     | 0.540          | HR, 1.04 (0.58 to 1.86)     | 0.900          |

Continuous variables were included after standardization and the hazard ratio represents the increase in one standard deviation of the variable.

\* All models adjusted for age, hypertension, heart failure, diabetes, chronic obstructive pulmonary disease, use of angiotensin converting enzyme inhibitor, heart rate, mean arterial pressure, pH, PEEP, fluid balance, use of vasopressor and prone positioning on the day of start of ventilation.

**Table S4 - Baseline Characteristics of the Included Patients According to BMI Category**

|                                             | <b>Normal<br/>(n = 244)</b> | <b>Overweight<br/>(n = 531)</b> | <b>Class I<br/>(n = 225)</b> | <b>Class II<br/>(n = 70)</b> | <b>Class III<br/>(n = 29)</b> | <b>p value</b> |
|---------------------------------------------|-----------------------------|---------------------------------|------------------------------|------------------------------|-------------------------------|----------------|
| Age, years                                  | 67.0 (60.0 - 73.0)          | 66.0 (59.0 - 73.0)              | 63.0 (54.0 - 71.0)           | 59.0 (49.2 - 66.8)           | 55.0 (48.0 - 59.0)            | < 0.001        |
| Male gender – no (%)                        | 186 (76.2)                  | 407 (76.6)                      | 153 (68.0)                   | 44 (62.9)                    | 12 (41.4)                     | < 0.001        |
| Body mass index, kg/m <sup>2</sup>          | 23.9 (22.9 - 24.6)          | 27.3 (26.2 - 28.5)              | 31.8 (30.9 - 33.2)           | 37.0 (35.9 - 38.2)           | 42.6 (41.5 - 46.1)            | < 0.001        |
| Transferred under invasive ventilation      | 51 (20.9)                   | 82 (15.4)                       | 36 (16.0)                    | 17 (24.3)                    | 6 (20.7)                      | 0.163          |
| Days between intubation and admission       | 0.0 (0.0 - 0.0)             | 0.0 (0.0 - 0.0)                 | 0.0 (0.0 - 0.0)              | 0.0 (0.0 - 0.0)              | 0.0 (0.0 - 0.0)               | 0.492          |
| Use of non-invasive ventilation – no (%)    | 15 (6.8)                    | 45 (9.4)                        | 16 (7.9)                     | 6 (9.1)                      | 2 (7.7)                       | 0.824          |
| Duration of non-invasive ventilation, hours | 5.5 (2.0 - 48.0)            | 8.0 (2.0 - 15.1)                | 8.0 (2.8 - 20.5)             | 7.0 (4.0 - 7.8)              | 4.5 (2.8 - 6.2)               | 0.797          |
| Chest CT scan performed – no (%)            | 83 (35.8)                   | 169 (33.2)                      | 72 (33.0)                    | 21 (30.9)                    | 10 (35.7)                     | 0.932          |
| Lung parenchyma affected – no (%)           |                             |                                 |                              |                              |                               | 0.712          |
| 0%                                          | 3 (3.6)                     | 6 (3.5)                         | 4 (5.6)                      | 0 (0.0)                      | 1 (10.0)                      |                |
| 25%                                         | 32 (38.1)                   | 51 (29.7)                       | 24 (33.3)                    | 6 (28.6)                     | 3 (30.0)                      |                |
| 50%                                         | 26 (31.0)                   | 52 (30.2)                       | 21 (29.2)                    | 6 (28.6)                     | 1 (10.0)                      |                |
| 75%                                         | 20 (23.8)                   | 53 (30.8)                       | 19 (26.4)                    | 7 (33.3)                     | 3 (30.0)                      |                |
| 100%                                        | 3 (3.6)                     | 10 (5.8)                        | 4 (5.6)                      | 2 (9.5)                      | 2 (20.0)                      |                |
| Chest X-ray performed – no (%)              | 127 (85.2)                  | 289 (86.5)                      | 121 (84.6)                   | 38 (88.4)                    | 16 (88.9)                     | 0.967          |
| Quadrants affected – no (%)                 |                             |                                 |                              |                              |                               | 0.380          |
| 1                                           | 14 (11.1)                   | 21 (7.2)                        | 5 (4.2)                      | 2 (5.4)                      | 0 (0.0)                       |                |
| 2                                           | 24 (19.0)                   | 67 (23.0)                       | 35 (29.2)                    | 9 (24.3)                     | 4 (25.0)                      |                |
| 3                                           | 37 (29.4)                   | 72 (24.7)                       | 35 (29.2)                    | 12 (32.4)                    | 8 (50.0)                      |                |
| 4                                           | 51 (40.5)                   | 131 (45.0)                      | 45 (37.5)                    | 14 (37.8)                    | 4 (25.0)                      |                |
| Severity of ARDS – no (%)                   |                             |                                 |                              |                              |                               | 0.651          |
| Mild                                        | 24 (10.0)                   | 51 (9.8)                        | 21 (9.5)                     | 6 (8.7)                      | 2 (7.1)                       |                |
| Moderate                                    | 157 (65.7)                  | 326 (62.3)                      | 119 (53.8)                   | 35 (50.7)                    | 17 (60.7)                     |                |
| Severe                                      | 58 (24.3)                   | 146 (27.9)                      | 81 (36.7)                    | 28 (40.6)                    | 9 (32.1)                      |                |
| Co-existing disorders – no (%)              |                             |                                 |                              |                              |                               |                |
| Hypertension                                | 74 (30.3)                   | 186 (35.0)                      | 80 (35.6)                    | 26 (37.1)                    | 8 (27.6)                      | 0.599          |
| Heart failure                               | 9 (3.7)                     | 31 (5.8)                        | 6 (2.7)                      | 1 (1.4)                      | 1 (3.4)                       | 0.231          |
| Diabetes                                    | 41 (16.8)                   | 115 (21.7)                      | 59 (26.2)                    | 20 (28.6)                    | 11 (37.9)                     | 0.016          |
| Chronic kidney disease                      | 8 (3.3)                     | 31 (5.8)                        | 8 (3.6)                      | 0 (0.0)                      | 0 (0.0)                       | 0.092          |
| Baseline creatinine, µmol/L*                | 77.0 (61.0 - 98.0)          | 78.0 (64.0 - 97.0)              | 78.0 (60.0 - 99.0)           | 73.0 (66.0 - 95.8)           | 71.0 (61.5 - 82.0)            | 0.794          |

**Table S4 - Baseline Characteristics of the Included Patients According to BMI Category**

|                                                           | <b>Normal<br/>(n = 244)</b> | <b>Overweight<br/>(n = 531)</b> | <b>Class I<br/>(n = 225)</b> | <b>Class II<br/>(n = 70)</b> | <b>Class III<br/>(n = 29)</b> | <b>p value</b> |
|-----------------------------------------------------------|-----------------------------|---------------------------------|------------------------------|------------------------------|-------------------------------|----------------|
| Liver cirrhosis                                           | 0 (0.0)                     | 2 (0.4)                         | 0 (0.0)                      | 1 (1.4)                      | 0 (0.0)                       | 0.324          |
| Chronic obstructive pulmonary disease                     | 20 (8.2)                    | 41 (7.7)                        | 17 (7.6)                     | 5 (7.1)                      | 2 (6.9)                       | 0.998          |
| Active hematological neoplasia                            | 5 (2.0)                     | 10 (1.9)                        | 1 (0.4)                      | 0 (0.0)                      | 0 (0.0)                       | 0.469          |
| Active solid neoplasia                                    | 6 (2.5)                     | 14 (2.6)                        | 5 (2.2)                      | 2 (2.9)                      | 0 (0.0)                       | 0.995          |
| Neuromuscular disease                                     | 2 (0.8)                     | 3 (0.6)                         | 2 (0.9)                      | 1 (1.4)                      | 0 (0.0)                       | 0.632          |
| Immunosuppression                                         | 9 (3.7)                     | 8 (1.5)                         | 5 (2.2)                      | 2 (2.9)                      | 0 (0.0)                       | 0.337          |
| Previous medication – no (%)                              |                             |                                 |                              |                              |                               |                |
| Systemic steroids                                         | 10 (4.1)                    | 17 (3.2)                        | 7 (3.1)                      | 3 (4.3)                      | 1 (3.4)                       | 0.897          |
| Inhalation steroids                                       | 21 (8.6)                    | 58 (10.9)                       | 23 (10.2)                    | 9 (12.9)                     | 13 (44.8)                     | < 0.001        |
| Angiotensin converting enzyme inhibitor                   | 33 (13.5)                   | 93 (17.5)                       | 45 (20.0)                    | 12 (17.1)                    | 3 (10.3)                      | 0.357          |
| Angiotensin II receptor blocker                           | 24 (9.8)                    | 57 (10.7)                       | 27 (12.0)                    | 13 (18.6)                    | 4 (13.8)                      | 0.319          |
| Beta-blockers                                             | 40 (16.4)                   | 98 (18.5)                       | 54 (24.0)                    | 13 (18.6)                    | 4 (13.8)                      | 0.280          |
| Insulin                                                   | 14 (5.7)                    | 38 (7.2)                        | 14 (6.2)                     | 7 (10.0)                     | 5 (17.2)                      | 0.183          |
| Metformin                                                 | 29 (11.9)                   | 77 (14.5)                       | 42 (18.7)                    | 15 (21.4)                    | 8 (27.6)                      | 0.044          |
| Statins                                                   | 70 (28.7)                   | 155 (29.2)                      | 77 (34.2)                    | 15 (21.4)                    | 8 (27.6)                      | 0.322          |
| Calcium channel blockers                                  | 47 (19.3)                   | 79 (14.9)                       | 42 (18.7)                    | 15 (21.4)                    | 10 (34.5)                     | 0.048          |
| Vital signs at the day of start of ventilation            |                             |                                 |                              |                              |                               |                |
| Heart rate, bpm**                                         | 84.0 (71.5 - 97.0)          | 84.0 (73.0 - 97.1)              | 85.0 (76.5 - 98.0)           | 90.5 (79.6 - 96.8)           | 80.5 (76.0 - 97.8)            | 0.201          |
| Mean arterial pressure, mmHg**                            | 78.7 (73.0 - 86.0)          | 80.0 (73.5 - 87.5)              | 82.0 (76.3 - 90.0)           | 81.2 (74.2 - 88.8)           | 83.8 (77.5 - 89.0)            | 0.007          |
| Laboratory tests at the day of start of ventilation       |                             |                                 |                              |                              |                               |                |
| pH**                                                      | 7.36 (7.30 - 7.41)          | 7.37 (7.32 - 7.41)              | 7.37 (7.31 - 7.41)           | 7.35 (7.30 - 7.40)           | 7.35 (7.31 - 7.39)            | 0.389          |
| Worst PaO <sub>2</sub> / FiO <sub>2</sub> , mmHg***       | 130.0 (101.0 - 166.9)       | 125.0 (98.5 - 162.4)            | 115.5 (88.1 - 148.8)         | 108.8 (83.3 - 145.0)         | 113.1 (87.2 - 131.3)          | 0.004          |
| PaCO <sub>2</sub> , mmHg**                                | 44.5 (39.5 - 51.3)          | 44.3 (38.8 - 49.6)              | 44.4 (39.5 - 49.5)           | 45.1 (41.8 - 53.1)           | 46.9 (39.8 - 56.6)            | 0.169          |
| Lactate mmol/L**                                          | 1.2 (0.9 - 1.5)             | 1.2 (1.0 - 1.4)                 | 1.1 (0.9 - 1.4)              | 1.0 (0.8 - 1.3)              | 1.2 (1.0 - 1.4)               | 0.082          |
| Organ support at the day of start of ventilation – no (%) |                             |                                 |                              |                              |                               |                |
| Continuous sedation                                       | 231 (95.1)                  | 506 (95.5)                      | 218 (96.9)                   | 69 (98.6)                    | 29 (100.0)                    | 0.577          |
| Inotropic or vasopressor                                  | 192 (79.0)                  | 412 (77.7)                      | 175 (77.8)                   | 47 (67.1)                    | 19 (65.5)                     | 0.151          |
| Vasopressor                                               | 192 (79.0)                  | 412 (77.7)                      | 174 (77.3)                   | 47 (67.1)                    | 19 (65.5)                     | 0.154          |
| Inotropic                                                 | 18 (7.4)                    | 17 (3.2)                        | 8 (3.6)                      | 2 (2.9)                      | 0 (0.0)                       | 0.088          |
| Fluid balance, mL                                         | 696.7 (29.0 - 1441.0)       | 515.8 (7.3 - 1239.3)            | 499.0 (-19.9 - 1321.0)       | 365.0 (-11.0 - 1477.0)       | 377.0 (6.0 - 887.0)           | 0.456          |

**Table S4 - Baseline Characteristics of the Included Patients According to BMI Category**

|                                                            | <b>Normal<br/>(n = 244)</b> | <b>Overweight<br/>(n = 531)</b> | <b>Class I<br/>(n = 225)</b> | <b>Class II<br/>(n = 70)</b> | <b>Class III<br/>(n = 29)</b> | <b>p value</b> |
|------------------------------------------------------------|-----------------------------|---------------------------------|------------------------------|------------------------------|-------------------------------|----------------|
| Urine output, mL                                           | 692.5 (333.8 - 1116.2)      | 647.5 (350.0 - 1145.0)          | 732.5 (445.0 - 1115.0)       | 600.0 (350.0 - 1090.0)       | 567.5 (387.5 - 1207.5)        | 0.669          |
| Ventilation support at the day of start of ventilation     |                             |                                 |                              |                              |                               |                |
| Assisted ventilation – no (%)                              | 73 (30.0)                   | 161 (30.6)                      | 65 (28.9)                    | 13 (18.6)                    | 6 (20.7)                      | 0.251          |
| Tidal volume, mL/kg PBW**                                  | 6.4 (5.9 - 6.9)             | 6.4 (5.9 - 7.0)                 | 6.6 (5.9 - 7.5)              | 6.5 (5.9 - 7.3)              | 7.0 (6.4 - 8.2)               | < 0.001        |
| PEEP, cmH <sub>2</sub> O**                                 | 12.0 (10.0 - 14.0)          | 12.7 (11.0 - 14.5)              | 13.5 (11.3 - 15.0)           | 14.0 (12.0 - 15.0)           | 14.7 (13.5 - 15.5)            | < 0.001        |
| Peak pressure, cmH <sub>2</sub> O**                        | 25.2 (22.8 - 28.9)          | 26.6 (23.5 - 29.3)              | 27.0 (24.7 - 30.4)           | 28.8 (26.7 - 32.0)           | 30.0 (27.5 - 34.1)            | < 0.001        |
| Driving pressure, cmH <sub>2</sub> O**                     | 13.0 (11.2 - 15.3)          | 13.7 (12.0 - 16.0)              | 14.2 (12.0 - 16.7)           | 15.2 (13.9 - 18.0)           | 15.5 (13.5 - 18.0)            | < 0.001        |
| Mechanical power, J/min**                                  | 18.1 (14.7 - 21.6)          | 18.2 (15.3 - 21.9)              | 18.0 (15.5 - 22.6)           | 21.8 (17.6 - 25.3)           | 22.3 (18.6 - 26.8)            | < 0.001        |
| Compliance, mL/cmH <sub>2</sub> O**                        | 36.2 (28.7 - 45.1)          | 33.4 (26.8 - 41.1)              | 33.1 (26.5 - 39.5)           | 30.6 (24.0 - 34.0)           | 30.6 (25.6 - 33.7)            | < 0.001        |
| Total respiratory rate, mpm**                              | 21.7 (19.3 - 24.0)          | 21.7 (19.8 - 24.0)              | 21.3 (19.0 - 23.7)           | 22.5 (20.0 - 25.0)           | 24.0 (22.0 - 26.0)            | 0.001          |
| FiO <sub>2</sub> **                                        | 0.54 (0.45 - 0.65)          | 0.57 (0.47 - 0.66)              | 0.60 (0.52 - 0.70)           | 0.64 (0.51 - 0.72)           | 0.65 (0.54 - 0.75)            | < 0.001        |
| etCO <sub>2</sub> , mmHg**                                 | 35.7 (32.0 - 40.7)          | 36.5 (32.4 - 41.6)              | 37.5 (33.6 - 43.3)           | 39.4 (35.4 - 44.3)           | 41.4 (35.4 - 45.0)            | < 0.001        |
| Rescue therapy at the day of start of ventilation – no (%) |                             |                                 |                              |                              |                               |                |
| Prone positioning                                          | 61 (25.3)                   | 161 (30.8)                      | 68 (30.9)                    | 27 (39.7)                    | 9 (31.0)                      | 0.209          |
| Duration, hours <sup>a</sup>                               | 9.0 (6.0 - 14.0)            | 8.0 (4.0 - 13.5)                | 8.0 (3.5 - 12.5)             | 6.0 (2.1 - 14.1)             | 10.0 (4.0 - 14.0)             | 0.270          |
| Recruitment maneuver                                       | 3 (1.5)                     | 12 (2.8)                        | 3 (1.6)                      | 1 (1.8)                      | 1 (3.7)                       | 0.699          |
| ECMO                                                       | 1 (0.4)                     | 0 (0.0)                         | 3 (1.4)                      | 0 (0.0)                      | 0 (0.0)                       | 0.081          |
| Use of NMBA                                                | 54 (22.2)                   | 154 (29.1)                      | 56 (24.9)                    | 23 (32.9)                    | 10 (34.5)                     | 0.151          |
| Hours of use of use <sup>a</sup>                           | 0.0 (0.0 - 0.0)             | 0.0 (0.0 - 8.0)                 | 0.0 (0.0 - 0.0)              | 0.0 (0.0 - 8.0)              | 0.0 (0.0 - 8.0)               | 0.247          |

Data are median (quartile 25% - quartile 75%) or No (%). Percentages may not total 100 because of rounding

CT: computed tomography; PEEP positive end expiratory pressure; ECMO: extracorporeal membrane oxygenation; FiO<sub>2</sub>: inspired fraction of oxygen; PEEP: positive end-expiratory pressure; NMBA: neuromuscular blocking agent

\* Most recent measurement in 24 hours before intubation, or at ICU admission under invasive ventilation

\*\* Aggregate as the mean of four values

\*\*\* Worst value of four available

**Table S5 - Clinical Outcomes in the Included Patients According to BMI Category**

|                                       | <b>Normal<br/>(n = 244)</b> | <b>Overweight<br/>(n = 531)</b> | <b>Class I<br/>(n = 225)</b> | <b>Class II<br/>(n = 70)</b> | <b>Class III<br/>(n = 29)</b> | <b>p value</b> |
|---------------------------------------|-----------------------------|---------------------------------|------------------------------|------------------------------|-------------------------------|----------------|
| <b>Primary outcome</b>                |                             |                                 |                              |                              |                               |                |
| 28-day mortality - no. (%)            | 71 (29.8)                   | 162 (30.9)                      | 51 (23.1)                    | 22 (32.4)                    | 3 (10.3)                      | 0.033          |
| <b>Secondary outcomes</b>             |                             |                                 |                              |                              |                               |                |
| Ventilator-free days at day 28, days  | 2.0 (0.0 - 18.0)            | 0.0 (0.0 - 15.0)                | 5.0 (0.0 - 16.0)             | 4.5 (0.0 - 17.0)             | 10.5 (5.0 - 18.0)             | 0.081          |
| Duration of ventilation, days         | 13.0 (7.0 - 23.0)           | 15.0 (8.0 - 24.0)               | 15.0 (9.0 - 24.0)            | 12.0 (9.0 - 17.0)            | 13.0 (7.5 - 21.5)             | 0.166          |
| In survivors at day 28, days          | 14.0 (8.0 - 27.0)           | 16.0 (10.0 - 30.0)              | 17.0 (10.0 - 28.0)           | 14.0 (9.0 - 22.8)            | 15.0 (9.5 - 22.0)             | 0.204          |
| Tracheostomy – no (%)                 | 47 (19.5)                   | 86 (16.3)                       | 43 (19.2)                    | 7 (10.1)                     | 3 (10.3)                      | 0.286          |
| Thromboembolic complications – no (%) | 80 (32.8)                   | 146 (27.5)                      | 62 (27.6)                    | 21 (30.0)                    | 5 (17.2)                      | 0.363          |
| Pulmonary embolism                    | 64 (26.2)                   | 112 (21.1)                      | 55 (24.4)                    | 11 (15.7)                    | 4 (13.8)                      | 0.203          |
| Deep vein thrombosis                  | 12 (4.9)                    | 29 (5.5)                        | 6 (2.7)                      | 7 (10.0)                     | 1 (3.4)                       | 0.151          |
| Ischemic stroke                       | 9 (3.7)                     | 15 (2.8)                        | 2 (0.9)                      | 3 (4.3)                      | 1 (3.4)                       | 0.199          |
| Myocardial infarction                 | 5 (2.0)                     | 9 (1.7)                         | 1 (0.4)                      | 1 (1.4)                      | 0 (0.0)                       | 0.573          |
| Systemic arterial embolism            | 2 (0.8)                     | 1 (0.2)                         | 0 (0.0)                      | 1 (1.4)                      | 0 (0.0)                       | 0.225          |
| Acute kidney injury – no (%)          | 104 (42.6)                  | 235 (44.4)                      | 99 (44.4)                    | 36 (51.4)                    | 14 (48.3)                     | 0.755          |
| Need for RRT – no (%)                 | 40 (16.4)                   | 103 (19.4)                      | 37 (16.4)                    | 17 (24.3)                    | 4 (13.8)                      | 0.482          |
| Need of rescue therapy – no (%)*      | 168 (69.7)                  | 393 (74.7)                      | 162 (73.0)                   | 59 (84.3)                    | 24 (82.8)                     | 0.109          |
| Prone positioning                     | 124 (51.5)                  | 300 (56.9)                      | 131 (58.7)                   | 43 (61.4)                    | 14 (48.3)                     | 0.353          |
| Recruitment maneuver                  | 9 (4.5)                     | 36 (8.2)                        | 12 (6.5)                     | 3 (5.2)                      | 3 (11.1)                      | 0.375          |
| Use of NMBA                           | 95 (38.9)                   | 266 (50.1)                      | 107 (47.6)                   | 42 (60.0)                    | 17 (58.6)                     | 0.006          |
| ECMO                                  | 1 (0.4)                     | 6 (1.1)                         | 5 (2.3)                      | 0 (0.0)                      | 0 (0.0)                       | 0.411          |
| ICU length of stay, days              | 14.0 (8.0 - 26.0)           | 16.0 (9.0 - 26.0)               | 16.0 (10.0 - 29.0)           | 14.0 (10.0 - 21.5)           | 15.0 (10.0 - 23.0)            | 0.220          |
| In survivors, days                    | 15.5 (9.3 - 29.0)           | 18.0 (11.0 - 31.0)              | 18.0 (11.0 - 30.0)           | 15.5 (11.0 - 26.5)           | 15.0 (10.0 - 22.3)            | 0.376          |
| Hospital length of stay, days         | 23.0 (13.0 - 37.3)          | 23.0 (13.0 - 36.0)              | 26.0 (18.0 - 41.0)           | 21.0 (12.0 - 31.5)           | 22.0 (11.5 - 32.0)            | 0.062          |
| In survivors, days                    | 29.0 (18.0 - 44.5)          | 30.0 (20.0 - 45.8)              | 31.0 (22.0 - 44.0)           | 27.5 (20.8 - 37.3)           | 24.5 (16.5 - 32.5)            | 0.195          |
| ICU mortality – no (%)                | 76 (31.9)                   | 186 (35.8)                      | 59 (27.2)                    | 21 (30.9)                    | 5 (17.9)                      | 0.084          |
| Hospital mortality – no (%)           | 80 (35.7)                   | 191 (39.0)                      | 60 (29.9)                    | 22 (33.3)                    | 5 (21.7)                      | 0.120          |
| 90-day mortality – no (%)             | 82 (37.4)                   | 201 (40.9)                      | 62 (31.0)                    | 24 (40.7)                    | 5 (19.2)                      | 0.040          |

**Table S5 - Clinical Outcomes in the Included Patients According to BMI Category**

|  | <b>Normal<br/>(n = 244)</b> | <b>Overweight<br/>(n = 531)</b> | <b>Class I<br/>(n = 225)</b> | <b>Class II<br/>(n = 70)</b> | <b>Class III<br/>(n = 29)</b> | <b>p value</b> |
|--|-----------------------------|---------------------------------|------------------------------|------------------------------|-------------------------------|----------------|
|--|-----------------------------|---------------------------------|------------------------------|------------------------------|-------------------------------|----------------|

Data are median (quartile 25% - quartile 75%) or No (%). Percentages may not total 100 because of rounding

*RRT: renal replacement therapy; NMBA: neuromuscular blocking agent; ECMO: extracorporeal membrane oxygenation; ICU: intensive care unit*

\* assessed in the first four days of ventilation

**Table S6 - Adjusted Effect of Body Mass Index Categories in 28-Day Mortality\***

|                          | Overall Group            |                   | Mild ARDS                |                   | Moderate ARDS            |                   | Severe ARDS              |                   |
|--------------------------|--------------------------|-------------------|--------------------------|-------------------|--------------------------|-------------------|--------------------------|-------------------|
|                          | Hazard Ratio<br>(95% CI) | <i>p</i><br>value | Hazard Ratio<br>(95% CI) | <i>p</i><br>value | Hazard Ratio<br>(95% CI) | <i>p</i><br>value | Hazard Ratio<br>(95% CI) | <i>p</i><br>value |
| <b>28-Day mortality</b>  |                          |                   |                          |                   |                          |                   |                          |                   |
| Body mass index category |                          |                   |                          |                   |                          |                   |                          |                   |
| Normal                   | 1 (Reference)            |                   | 1 (Reference)            |                   | 1 (Reference)            |                   | 1 (Reference)            |                   |
| Overweight               | 1.10 (0.83 to 1.47)      | 0.500             | 0.69 (0.19 to 2.47)      | 0.570             | 1.11 (0.77 to 1.60)      | 0.570             | 0.96 (0.53 to 1.72)      | 0.890             |
| Class I                  | 0.80 (0.55 to 1.17)      | 0.250             | 0.12 (0.01 to 1.29)      | 0.081             | 0.80 (0.49 to 1.31)      | 0.380             | 0.75 (0.38 to 1.52)      | 0.430             |
| Class II                 | 1.43 (0.87 to 2.36)      | 0.160             | 1.08 (0.11 to 10.48)     | 0.950             | 0.71 (0.31 to 1.62)      | 0.420             | 2.63 (1.16 to 5.97)      | 0.021             |
| Class III                | 0.47 (0.14 to 1.51)      | 0.200             | 0.00 (0.00 to ∞)         | 0.999             | 0.18 (0.02 to 1.35)      | 0.096             | 1.83 (0.37 to 9.02)      | 0.460             |

Continuous variables were included after standardization and the hazard ratio represents the increase in one standard deviation of the variable.

\* All models adjusted for age, hypertension, heart failure, diabetes, chronic obstructive pulmonary disease, use of angiotensin converting enzyme inhibitor, heart rate, mean arterial pressure, pH, PEEP, fluid balance, use of vasopressor and prone positioning on the day of start of ventilation.
